# Supplementary material for: Polyoxometalates as chemically and structurally versatile components in self-assembled materials
Source: Royal Society of Chemistry journal article supplement (doi:10.1039/d1sc05879g), 2021-12-22
Supplement: d1sc05879g1.pdf [file d1sc05879g1.pdf]

| Parent POM Platform                                                                                 | Compound formula                                                                                                              | Reaction type or reacting group / Conditions tolerated                                                                                                | Reference |
|-----------------------------------------------------------------------------------------------------|-------------------------------------------------------------------------------------------------------------------------------|-------------------------------------------------------------------------------------------------------------------------------------------------------|-----------|
| Mn-Anderson (P1)                                                                                    | $\text{TBA}_3[\text{MnMo}_6\text{O}_{18}\{(\text{OCH}_2)_3\text{C-4-Py}\}_2]$                                                 | Coordination of transition metal ion; CuI<br>Base = triethylamine                                                                                     | 1         |
|                                                                                                     | $\text{TBA}_3[\text{MnMo}_6\text{O}_{18}\{(\text{OCH}_2)_3\text{C-NH}_2\}_2]$                                                 | Imine formation; H(O)C-R                                                                                                                              | 2         |
|                                                                                                     | $\text{TBA}_3[\text{MnMo}_6\text{O}_{18}\{(\text{OCH}_2)_3\text{CNH-Ph-4-I}\}_2]$                                             | Mo = N imide bond formation; O = Mo-POM<br>Coupling Agent = N, N'-Dicyclohexylcarbodiimide(DCC)                                                       | 3         |
|                                                                                                     | $\text{TBA}_3[\text{MnMo}_6\text{O}_{18}\{(\text{OCH}_2)_3\text{CNH-Ph-4-I}\}_2]$                                             | Sonogashira coupling; HC≡C-aryl<br>Catalyst = Pd(Ph <sub>3</sub> ) <sub>2</sub> Cl <sub>2</sub> , CuI Base = Diisopropylamine                         | 4         |
|                                                                                                     | $\text{TBA}_3[\text{MnMo}_6\text{O}_{18}\{(\text{OCH}_2)_3\text{CNHC(O)-spiropyran-NO}_2\}\{(\text{OCH}_2)_3\text{C-NH}_2\}]$ | Amidation; HOOC-R, Reversible photoisomerization                                                                                                      | 5         |
|                                                                                                     | $\text{TBA}_3[\text{MnMo}_6\text{O}_{18}\{(\text{OCH}_2)_3\text{C-NH-Fmoc}\}\{(\text{OCH}_2)_3\text{C-NH}_2\}]$               | Ester bond formation; HOOC-R<br>Base = triethylamine                                                                                                  | 6         |
|                                                                                                     | $\text{TBA}_3[\text{MnMo}_6\text{O}_{18}\{(\text{OCH}_2)_3\text{CNHC(O)CH}_2\text{-N}_3\}_2]$                                 | Cu(I)-Catalyzed azide-alkyne 1,3-dipolar cycloaddition; HC≡C-R<br>Base= N,N-Diisopropylethylamine, Catalyst = CuI                                     | 7         |
|                                                                                                     | $\text{TBA}_3[\text{MnMo}_6\text{O}_{18}\{(\text{OCH}_2)_3\text{CNHC(O)Ph-4-N}_3\}\{(\text{OCH}_2)_3\text{C-NH}_2\}]$         | Amide bond formation and Cu(I)-catalyzed azide-alkyne 1,3-dipolar cycloaddition; HC≡C-R and HOOC-R<br>Base= N,N-Diisopropylethylamine, Catalyst = CuI | 7         |
| $\text{TBA}_3[\text{MnMo}_6\text{O}_{18}\{(\text{OCH}_2)_3\text{CNHC(O)CH}_2\text{O-coumarin}\}_2]$ | Reversible photodimerization (254/365 nm light)                                                                               | 8                                                                                                                                                     |           |

| Parent POM Platform | Compound formula                                                        | Reaction type or reacting group / Conditions tolerated                                                              | Reference |
|---------------------|-------------------------------------------------------------------------|---------------------------------------------------------------------------------------------------------------------|-----------|
| Lindqvist (P2)      | $TBA_2[V_3Mo_3O_{16}((OCH_2)_3CCH_2OH)]$                                | Esterification; HOOC-R                                                                                              | 9         |
|                     | $TBA_2[V_6O_7(OCH_3)_9(OCH_2)_3C-NH_2]$                                 | Imine formation; R-CHO<br>Coupling Agent = $B(OCH_2CF_3)_3$                                                         | 10        |
|                     | $TBA_2[V_6O_{13}\{(OCH_2)_3CCH_2-N_3\}_2]$                              | Catalytic azide-alkyne 1,3-dipolar cycloaddition;<br>R-C≡C-H<br>Catalyst = CuI, Base = N,N-Diisopropylethylamine    | 11        |
|                     | $TBA_2[V_6O_{13}\{(OCH_2)_3CCH_2-SO_3Ph-4-Me\}_2]$                      | Nucleophilic substitution; NaBr or $NaN_3$                                                                          | 12        |
|                     | $TBA_2[V_6O_{13}\{(OCH_2)_3CNHC(O)-3-Py\}_2]$                           | Coordination to metal (Pd)<br>Reagents = Dimethylacetamide, $[PdCl_2(MeCN)_2]$                                      | 13        |
|                     | $TBA_2[V_6O_{13}\{(OCH_2)_3CCH_2OC(O)-C_6H_4-COOH\}_2]$                 | Amidation reaction; $H_2N-R$<br>Catalyst = (4-(N,N-dimethylamino)pyridine), Base = triethylamine                    | 14        |
|                     | $TBA_2[Mo_6O_{18}\{\equiv N-Ph(2,6-Me)-4-I\}]$                          | Sonogashira coupling; $HC\equiv C-Ar-R$ , $HC\equiv C-Fc$<br>Catalyst = $Pd(Ph_3)_2Cl_2$ , CuI Base = Triethylamine | 15        |
|                     | $TBA_2[Mo_6O_{18}\{\equiv N-Ph(2,6-R')-4-X\}]$ , R' = Me, Et, X = Br, I | Heck coupling ; $H_2C=C-R_2$<br>Catalyst = $[Pd_2(dba)_3]$ , Base = PhNHMgBr                                        | 16        |
|                     | $TBA_2[Mo_6O_{18}\{\equiv N-Ar-OH\}]$ , Ar-OH = Ph-2-Me-4-OH            | Esterification; Ar-OH = Ph-2-Me-4-OH, $HOOC-RO(C(O)-R)_2$<br>Coupling Agent = DCC                                   | 17        |
|                     | $TBA_2[Mo_6O_{18}\{\equiv N-Ph-4-CH=CH_2\}]$                            | Copolymerization; $H_2C=CH-Ph-4-Me$                                                                                 | 18        |
|                     | $TBA_2[Mo_6O_{18}\{\equiv N-Ph-4-COOH\}]$                               | Coordination of transition metal ion (Cu)<br>Reagent = $Cu(CH_3COO)_2$                                              | 19        |

| Parent Keggin composition (P3)                                                                        | Compound composition                                                                                                                                                                              | Reaction type or reacting group / Conditions tolerated                                                                              | Reference |
|-------------------------------------------------------------------------------------------------------|---------------------------------------------------------------------------------------------------------------------------------------------------------------------------------------------------|-------------------------------------------------------------------------------------------------------------------------------------|-----------|
| [A- $\alpha$ -PW <sub>9</sub> O <sub>34</sub> {(Si('Bu)-R') <sub>3</sub> }]                           | TBA <sub>3</sub> [A- $\alpha$ -PW <sub>9</sub> O <sub>34</sub> {(Si('Bu)-R') <sub>3</sub> }]                                                                                                      | Cl <sub>3</sub> Si- R                                                                                                               | 20, 21    |
| [A- $\alpha$ -XW <sub>9</sub> O <sub>34</sub> {(OSi-R) <sub>3</sub> (E-R')}]<br>X = P, Si; E = Si, Ge | TBA <sub>3</sub> H[ $\alpha$ -SiW <sub>9</sub> O <sub>34</sub> {(OSi(CH <sub>2</sub> ) <sub>6</sub> -CH=CH <sub>2</sub> ) <sub>3</sub> (Si(CH <sub>2</sub> ) <sub>6</sub> -CH=CH <sub>2</sub> )}] | Copolymerization; H <sub>2</sub> C=C(Me)C(O)Me<br>Base = triethylamine                                                              | 22, 23    |
|                                                                                                       | TBA <sub>3</sub> [ $\alpha$ -PW <sub>9</sub> O <sub>34</sub> {(OSi <sup>t</sup> Bu) <sub>3</sub> (Ge(CH <sub>2</sub> ) <sub>2</sub> -COOH)}]                                                      | Amidation; NH <sub>2</sub> -CH <sub>2</sub> C $\equiv$ CH                                                                           | 24        |
| [ $\gamma$ -SiW <sub>10</sub> O <sub>36</sub> {O(Si-R) <sub>2</sub> }]                                | TBA <sub>4</sub> [ $\gamma$ -SiW <sub>10</sub> O <sub>36</sub> {O(Si(CH <sub>2</sub> ) <sub>3</sub> OC(O)-C(Me)=CH <sub>2</sub> ) <sub>2</sub> }]                                                 | Copolymerization; H <sub>2</sub> C=C(Me)C(O)OMe<br>Initiator = Azobisisobutyronitrile (AIBN)                                        | 25        |
| [ $\alpha$ -PW <sub>11</sub> O <sub>39</sub> {O(Si-R) <sub>2</sub> }]                                 | TBA <sub>3</sub> [ $\alpha$ -PW <sub>11</sub> O <sub>39</sub> {O(Si-CH=CH <sub>2</sub> ) <sub>2</sub> }]                                                                                          | Hydrosylation; H-Si-R <sub>3</sub>                                                                                                  | 26        |
|                                                                                                       | TBA <sub>3</sub> [ $\alpha$ -PW <sub>11</sub> O <sub>39</sub> {O(Si-CH=CH <sub>2</sub> ) <sub>2</sub> }]                                                                                          | Copolymerization; butyl acrylate                                                                                                    | 27        |
|                                                                                                       | TBA <sub>3</sub> [ $\alpha$ -PW <sub>11</sub> O <sub>39</sub> {O(Si-Ph-4-I) <sub>2</sub> }]                                                                                                       | Sonogashira coupling; HC $\equiv$ C-Ar-R<br>Catalyst = Pd(Ph <sub>3</sub> ) <sub>2</sub> Cl <sub>2</sub> , CuI Base = Triethylamine | 28, 29    |
|                                                                                                       | TBA <sub>3</sub> [ $\alpha$ -PW <sub>11</sub> O <sub>39</sub> {O(Si-Ph-4-C $\equiv$ C-4'-Py) <sub>2</sub> }]                                                                                      | Coordination to metal                                                                                                               | 30        |
| [ $\alpha$ -SiW <sub>11</sub> O <sub>39</sub> {O(Si-R) <sub>2</sub> }]                                | (Hex <sub>4</sub> N) <sub>4</sub> [ $\alpha$ -SiW <sub>11</sub> O <sub>39</sub> {O(Si(CH <sub>2</sub> ) <sub>3</sub> -NH <sub>2</sub> ) <sub>2</sub> }]                                           | Imine bond formation; salicylaldehyde<br>Cat = Hex <sub>4</sub> N                                                                   | 31        |
|                                                                                                       | (TBA) <sub>4</sub> [ $\alpha$ -SiW <sub>11</sub> O <sub>39</sub> {O(Si(CH <sub>2</sub> ) <sub>3</sub> -NH <sub>2</sub> ) <sub>2</sub> }]                                                          | HOOC-(azobenzene) <sub>n</sub>                                                                                                      | 32        |

| Parent Wells-Dawson Composition (P4)                                                 | Compound composition                                                                                                                                                  | Reaction type or reacting group / Conditions tolerated                                                                                                                                                     | Reference |
|--------------------------------------------------------------------------------------|-----------------------------------------------------------------------------------------------------------------------------------------------------------------------|------------------------------------------------------------------------------------------------------------------------------------------------------------------------------------------------------------|-----------|
| $[\alpha_2\text{-P}_2\text{W}_{17}\text{O}_{61}\{\text{O}(\text{Si-R})_2\}]$         | $(\text{Me}_2\text{NH}_2)_6[\alpha_2\text{-P}_2\text{W}_{17}\text{O}_{61}\{\text{O}(\text{Si}(\text{CH}_2)_3\text{O}(\text{O})\text{CC}(\text{Me})=\text{CH}_2)_2\}]$ | Copolymerization; $\text{H}_2\text{C}=\text{C}(\text{Me})\text{C}(\text{O})\text{OMe}$                                                                                                                     | 33, 34    |
|                                                                                      | $\text{TBA}_6[\alpha_2\text{-P}_2\text{W}_{17}\text{O}_{61}\{\text{O}(\text{Si-Ph-4-I})_2\}]$                                                                         | Sonogashira coupling; $\text{HC}\equiv\text{C-Ar-R}$<br>Catalyst = $\text{Pd}(\text{Ph}_3)_2\text{Cl}_2$ , $\text{CuI}$ Base = Triethylamine                                                               | 35-37     |
|                                                                                      | $\text{TBA}_6[\alpha_2\text{-P}_2\text{W}_{17}\text{O}_{61}\{\text{O}(\text{Si-Ph-4-C}\equiv\text{C-Ph-terpyridyl})_2\}]$                                             | Coordination of transition metal ion                                                                                                                                                                       | 38        |
|                                                                                      | $\text{TBA}_6[\alpha_2\text{-P}_2\text{W}_{17}\text{O}_{61}\{\text{O}(\text{SiPh-4-CH}_2\text{-N}_3)_2\}]$                                                            | $\text{Cu}(\text{I})$ -Catalyzed azide-alkyne 1,3-dipolar cycloaddition; $\text{HC}\equiv\text{CR}$<br>Catalyst = $\text{CuSO}_4$ , Ascorbic acid                                                          | 39        |
| $[\text{P}_2\text{W}_{15}\text{V}_3\text{O}_{59}\{(\text{OCH}_2)_3\text{CNHCO-R}\}]$ | $\text{TBA}_5\text{H}[\text{P}_2\text{W}_{15}\text{V}_3\text{O}_{59}\{(\text{OCH}_2)_3\text{CNHC}(\text{O})\text{-C}(\text{Me})=\text{CH}_2\}]$                       | Copolymerization; $\text{H}_2\text{C}=\text{C}(\text{Me})\text{C}(\text{O})\text{OMe}$<br>Initiator = Azobisisobutyronitrile (AIBN)                                                                        | 40        |
|                                                                                      | $\text{TBA}_6[\text{P}_2\text{W}_{15}\text{V}_3\text{O}_{59}\{(\text{OCH}_2)_3\text{CNHC}(\text{O})\text{CH}_2\text{-N}_3\}]$                                         | $\text{Cu}(\text{I})$ -Catalyzed azide-alkyne 1,3-dipolar cycloaddition; $\text{HC}\equiv\text{C-R}$<br>Catalyst = $\text{Cu}(\text{I})(\text{MeCN})\text{PF}_4$ , Base = <i>N,N</i> Diisopropylethylamine | 41        |
|                                                                                      | $\text{TBA}_5\text{H}[\text{P}_2\text{W}_{15}\text{V}_3\text{O}_{59}\{(\text{OCH}_2)_3\text{CNHC}(\text{O})\text{-C}(\text{Me}_2)\text{Br}\}]$                        | Copolymerization with styrene; $\text{CH}_2=\text{CH-C}_6\text{H}_5$<br>$\text{CuBr}$ , Pentamethyldiethylenetriamine                                                                                      | 42        |
|                                                                                      | $\text{TBA}_6[\text{P}_2\text{W}_{15}\text{V}_3\text{O}_{59}\{(\text{OCH}_2)_3\text{CNHC}(\text{O})\text{CH}_2\text{O-coumarin}\}]$                                   | Reversible photodimerization (254/365 nm light)                                                                                                                                                            | 43        |

## Reference

1. X. X. Li, Y. X. Wang, R. H. Wang, C. Y. Cui, C. B. Tian and G. Y. Yang, *Angew. Chem., Int. Ed. Engl.*, 2016, **55**, 6462-6466.
2. H. Karoui and C. Ritchie, *Dalton Trans.*, 2016, **45**, 18838-18841.
3. J. Zhang, P. Yin, J. Hao, F. Xiao, L. Chen and Y. Wei, *Chemistry*, 2012, **18**, 13596-13599.
4. L. S. Wang, Y. Lu, G. M. Maille, S. P. Anthony, D. Nolan and S. M. Draper, *Inorg. Chem.*, 2016, **55**, 9497-9500.
5. A. Saad, O. Oms, J. Marrot, A. Dolbecq, K. Hakouk, H. El Bekkachi, S. Jobic, P. Deniard, R. Dessapt and D. Garrot, *J. Mater. Chem. C*, 2014, **2**, 4748-4758.
6. C. Yvon, A. Macdonell, S. Buchwald, A. J. Surman, N. Follet, J. Alex, D.-L. Long and L. Cronin, *Chem. Sci.*, 2013, **4**, 3810-3817.
7. A. Macdonell, N. A. B. Johnson, A. J. Surman and L. Cronin, *J. Am. Chem. Soc.*, 2015, **137**, 5662-5665.
8. U. Tong, W. Chen, C. Ritchie, X. Wang and Y.-F. Song, *Chem. Eur. J.*, 2014, **20**, 1500-1504.
9. H. Karoui and C. Ritchie, *New J. Chem.*, 2018, **42**, 25-28.
10. O. Nachtigall and J. Spandl, *Chemistry*, 2018, **24**, 2785-2789.
11. H. Jia, Q. Li, A. Bayaguud, Y. Huang, S. She, K. Chen and Y. Wei, *Dalton Trans.*, 2018, **47**, 577-584.
12. H. Jia, Q. Li, A. Bayaguud, S. She, Y. Huang, K. Chen and Y. Wei, *Sci. Rep.*, 2017, **7**, 12523.
13. M. P. Santoni, A. K. Pal, G. S. Hanan, M. C. Tang, K. Venne, A. Furtos, P. Menard-Tremblay, C. Malveau and B. Hasenknopf, *Chem. Commun.*, 2012, **48**, 200-202.
14. B. Huang, Z. Xiao, B. Wu, X. Hu, X. Hu, P. Wu and Y. Wei, *Inorg. Chem. Front.*, 2017, **4**, 165-170.
15. Y. Wei, B. Xu, C. L. Barnes and Z. Peng, *J. Am. Chem. Soc.*, 2001, **123**, 4083-4084.
16. Y. Zhu, L. Wang, J. Hao, P. Yin, J. Zhang, Q. Li, L. Zhu and Y. Wei, *Chemistry*, 2009, **15**, 3076-3080.
17. L. Zhu, Y. Zhu, X. Meng, J. Hao, Q. Li, Y. Wei and Y. Lin, *Chemistry*, 2008, **14**, 10923-10927.
18. A. Moore and H. Kwen, *Chem. Commun.*, 2000, 1793-1794.
19. Y. Zhu, P. Yin, F. Xiao, D. Li, E. Bitterlich, Z. Xiao, J. Zhang, J. Hao, T. Liu, Y. Wang and Y. Wei, *J. Am. Chem. Soc.*, 2013, **135**, 17155-17160.
20. A. Mazeaud, N. Ammari, F. Robert and R. Thouvenot, *Angew. Chem., Int. Ed. Engl.*, 1996, **35**, 1961-1964.
21. D. Agustin, C. Coelho, A. Mazeaud, P. Herson, A. Proust and R. Thouvenot, *Z. fur Anorg. Allg. Chem.*, 2004, **630**, 2049-2053.
22. T. Minato, K. Suzuki, K. Yamaguchi and N. Mizuno, *Chemistry*, 2017, **23**, 14213-14220.
23. M. Carraro, G. Modugno, G. Fiorani, C. Maccato, A. Sartorel and M. Bonchio, *Eur. J. Org. Chem.*, 2012, **2012**, 281-289.
24. N. Joo, S. Renaudineau, G. Delapierre, G. Bidan, L. M. Chamoreau, R. Thouvenot, P. Gouzerh and A. Proust, *Chemistry*, 2010, **16**, 5043-5051.
25. C. R. Mayer, R. Thouvenot and T. Lalot, *Chem. Mater.*, 2000, **12**, 257-260.
26. D. Agustin, J. Dallery, C. Coelho, A. Proust and R. Thouvenot, *J. Organomet. Chem.*, 2007, **692**, 746-754.
27. J. L. Horan, A. Genupur, H. Ren, B. J. Sikora, M.-C. Kuo, F. Meng, S. F. Dec, G. M. Haugen, M. A. Yandrasits, S. J. Hamrock, M. H. Frey, A. M. Herring, J. Sikora, M.-C. Kuo, F. Meng, A. M. Herring, J. L. Horan, S. F. Dec and M. H. Frey, *ChemSusChem*, 2009, **2**, 226-229.
28. B. Matt, C. Coudret, C. Viala, D. Jouvenot, F. Loiseau, G. Izzet and A. Proust, *Inorg. Chem.*, 2011, **50**, 7761-7768.
29. V. Duffort, R. Thouvenot, C. Afonso, G. Izzet and A. Proust, *Chem. Commun.*, 2009, DOI: 10.1039/b913475a, 6062-6064.
30. M. Piot, S. Hupin, H. Lavanant, C. Afonso, L. Bouteiller, A. Proust and G. Izzet, *Inorg. Chem.*, 2017, **56**, 8490-8496.
31. I. Bar-Nahum, H. Cohen and R. Neumann, *Inorg. Chem.*, 2003, **42**, 3677-3684.
32. S. u. Hassan, Y. Zhou, L. Zhang, Z. Shi, D. Yang, H. M. Asif and N. Qu, *J. Phys. Chem. C.*, 2016, **120**, 7757-7766.
33. T. Hasegawa, H. Murakami, K. Shimizu, Y. Kasahara, S. Yoshida, T. Kurashina, H. Seki and K. Nomiya, *Inorganica Chim. Acta*, 2008, **361**, 1385-1394.
34. T. Hasegawa, K. Shimizu, H. Seki, H. Murakami, S. Yoshida, K. Yoza and K. Nomiya, *Inorg. Chem. Commun.*, 2007, **10**, 1140-1144.
35. B. Matt, S. Renaudineau, L. M. Chamoreau, C. Afonso, G. Izzet and A. Proust, *J. Org. Chem.*, 2011, **76**, 3107-3112.
36. B. Matt, J. Fize, J. Moussa, H. Amouri, A. Pereira, V. Artero, G. Izzet and A. Proust, *Energy Environ. Sci.*, 2013, **6**, 1504-1508.
37. C. Bosch-Navarro, B. Matt, G. Izzet, C. Romero-Nieto, K. Dirian, A. Raya, S. I. Molina, A. Proust, D. M. Guldi, C. Martí-Gastaldo and E. Coronado, *Chem. Sci.*, 2014, **5**, 4346-4354.
38. G. Izzet, B. Abecassis, D. Brouri, M. Piot, B. Matt, S. A. Serapian, C. Bo and A. Proust, *J. Am. Chem. Soc.*, 2016, **138**, 5093-5099.

## ARTICLE

## Journal Name

39. M. B. Hu, N. Xia, W. Yu, C. Ma, J. Tang, Z. Y. Hou, P. Zheng and W. Wang, *Polym. Chem.*, 2012, **3**, 617-620.
40. V. Kalyani, V. S. V. Satyanarayana, V. Singh, C. P. Pradeep, S. Ghosh, S. K. Sharma and K. E. Gonsalves, *Chem. Eur. J.*, 2015, **21**, 2250-2258.
41. S. Vanhaecht, T. Quanten and T. N. Parac-Vogt, *Dalton Trans.*, 2017, **46**, 10215-10219.
42. Y. Han, Y. Xiao, Z. Zhang, B. Liu, P. Zheng, S. He and W. Wang, *Macromolecules*, 2009, **42**, 6543-6548.
43. W. Chen, U. Tong, T. Zeng, C. Streb and Y.-F. Song, *J. Mater. Chem. C.*, 2015, **3**, 4388-4393.
